# Supplementary material
Source: publisher site journal article supplement (https://www.dovepress.com/article/503977)
Supplement: Supplementary file 1 [file IJN_Rev.1_Figures_S1.pdf › IJN_Rev.1_Figures_S1.pdf]

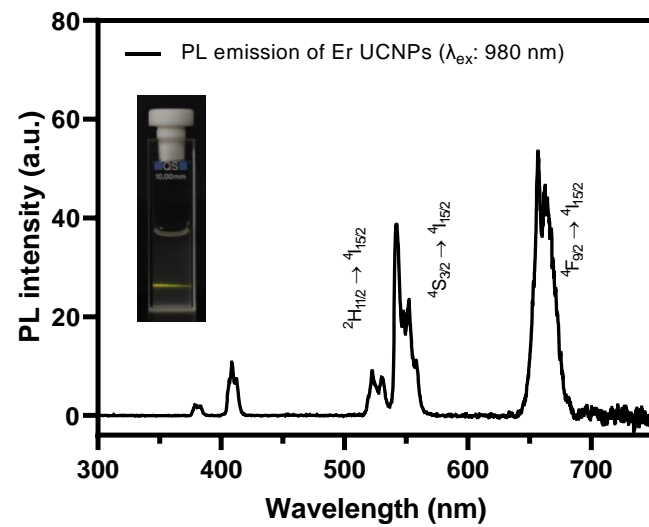

**Figure S1** PL spectra of Er UCNPs after excitation with 980 nm laser (inset: digital luminescence photographs)
