# Supplementary material
Source: publisher site journal article supplement (https://www.dovepress.com/article/503977)
Supplement: Supplementary file 3 [file IJN_Rev.1_Figures_S3.pdf › IJN_Rev.1_Figures_S3.pdf]

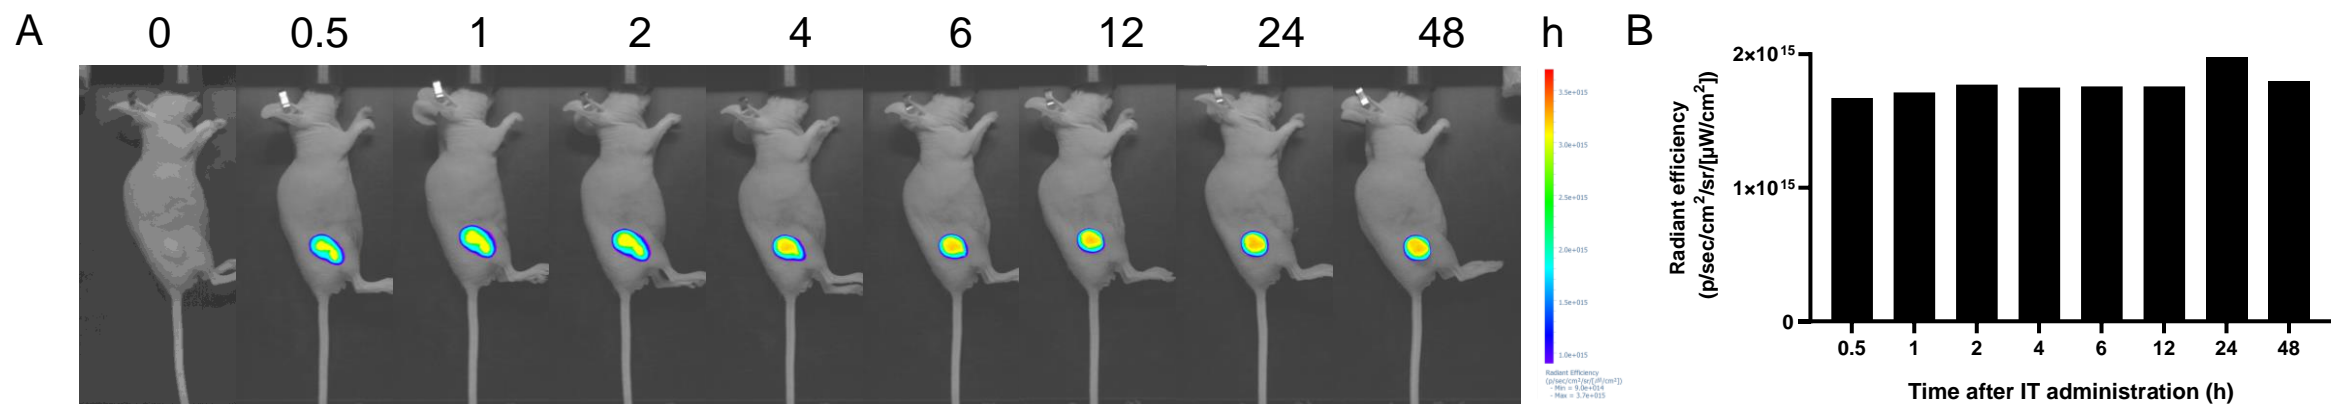

**Figure S3** *In vivo* fluorescent imaging (A) The digital photographs and (B) the summary of the radiant efficiency of HT-29 xenograft Balb/c nude mouse after intratumoral injection of U@MSC@MP NPs (Ce6 dose of 5 mg/kg) at different post-injection time (0, 0.5, 1, 2, 4, 6, 12, 24, 48 h) (n=1)
