# Supplementary material
Source: publisher site journal article supplement (https://www.dovepress.com/article/503977)
Supplement: Supplementary file 4 [file IJN_Rev.1_Figures_S4.pdf › IJN_Rev.1_Figures_S4.pdf]

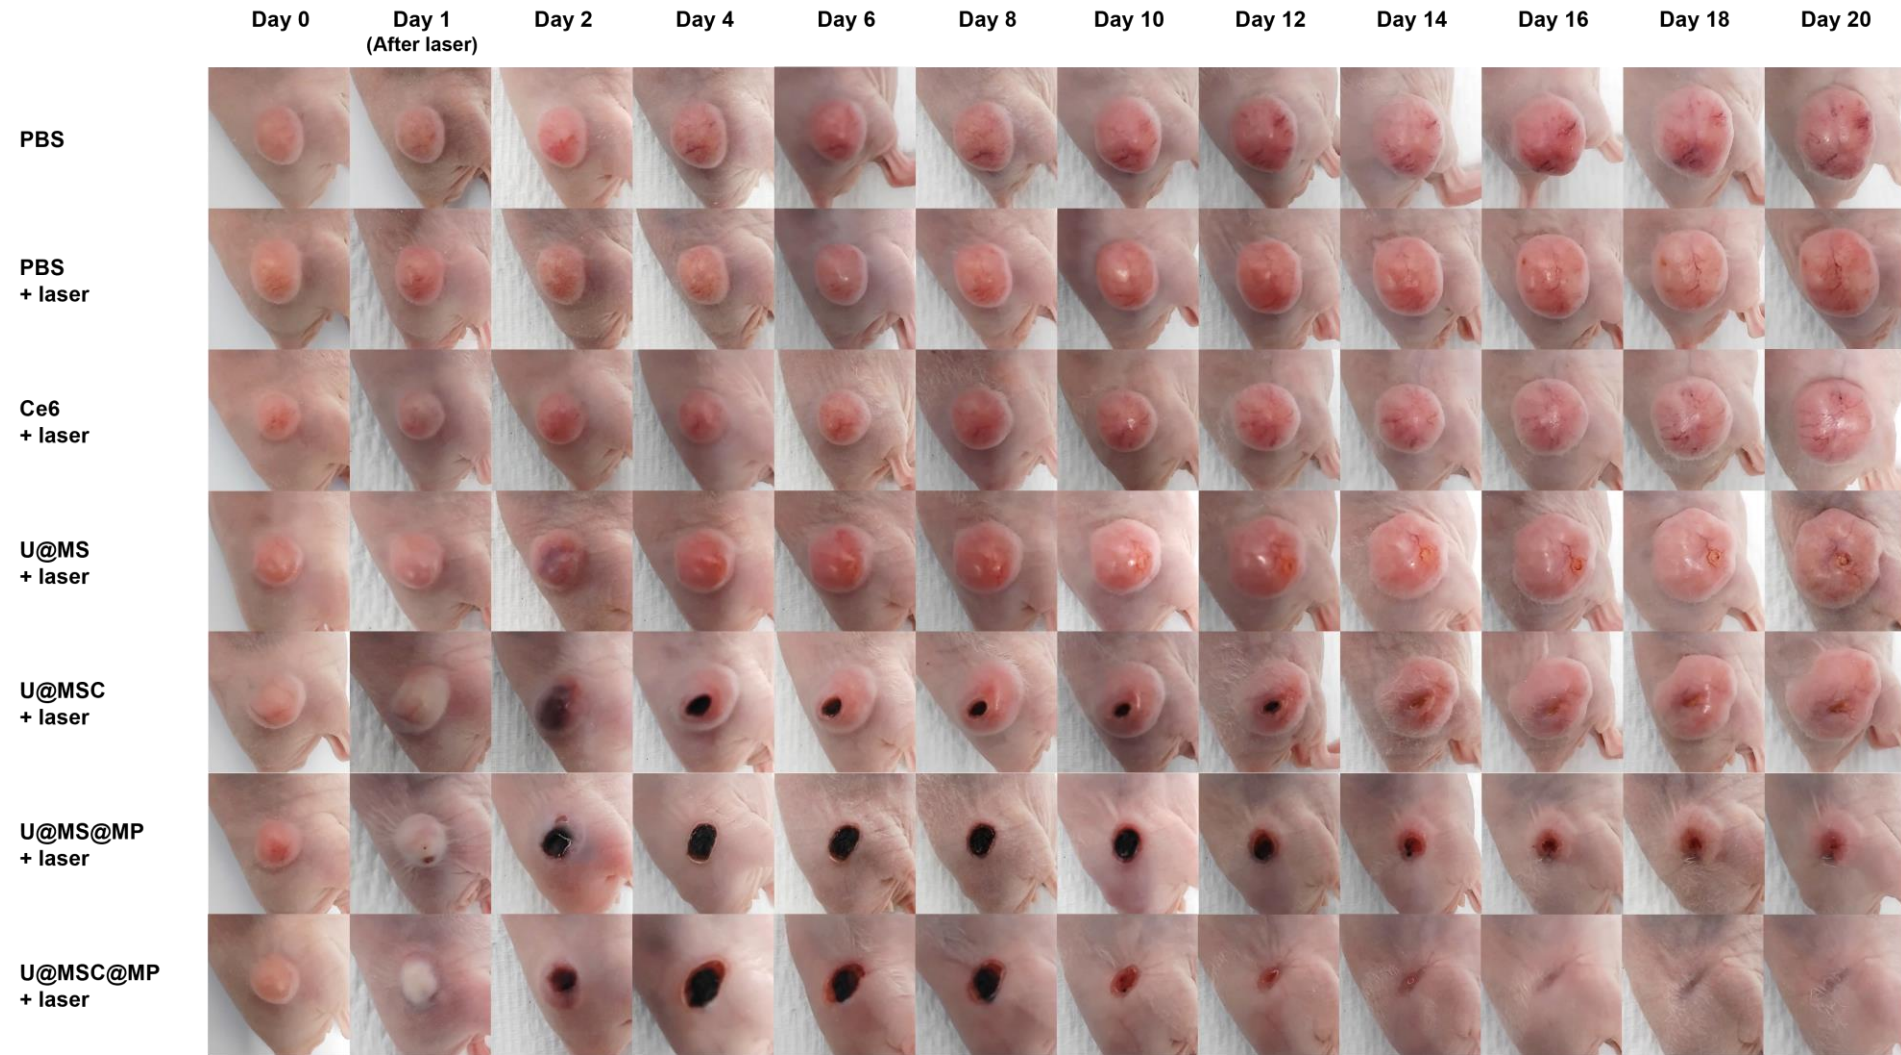

**Figure S4** The representative digital photographs of the tumor site from the *In vivo* antitumor efficacy study in HT-29 tumor xenograft BALB/c mice.
